# Supplementary material for: Association Between Vitamin D Supplementation During Pregnancy and Offspring Growth, Morbidity, and Mortality: A Systematic Review and Meta-analysis
Source: PubMed Central journal article supplement (PMC6137512; doi:10.1001/jamapediatrics.2018.0302), 2018-05-29

## Supplementary Online Content

Bi WG, Nuyt AM, Weiler H, Leduc L, Santamaria C, Wei SQ. Association between vitamin D supplementation during pregnancy and offspring growth, morbidity, and mortality: a systematic review and meta-analysis. *JAMA Pediatr.* Published online May 29, 2018. doi:10.1001/jamapediatrics.2018.0302

**eTable.** Assessment of Bias Risk of Randomized Clinical Trials

**eFigure 1.** Summary Risk Ratio (RR) of the Association Between Vitamin D Supplementation and Small for Gestational Age (SGA) Stratified by Administration Method of Intervention (Regular or Bolus Dose)

**eFigure 2.** Summary Risk Ratio of the Association Between Vitamin D Supplementation and Fetal or Neonatal Mortality Stratified by Administration Method of Intervention (Regular or Bolus Dose).

**eFigure 3.** Forest Plots of Summary Mean Difference (MD) of Neonatal 25-Hydroxyvitamin D (25[OH]D) (ng/mL) Between Vitamin D Supplementation Group and Control Group

**eFigure 4.** Forest Plots of Summary Mean Difference (MD) of Neonatal Calcium (mg/dL) Between Vitamin D Supplementation Group and Control Group

**eFigure 5.** Forest Plots of Summary Mean Difference (MD) of Birth Weight (g) Between Vitamin D Supplementation Group and Control Group

**eFigure 6.** Forest Plots of Summary Mean Difference (MD) of Postnatal Weight (kg) Between Vitamin D Supplementation Group and Control Group in Infants at Age 3 Months; 6 Months; 9 Months; and 12 Months

**eFigure 7.** The Funnel Plots of the Primary Outcomes

This supplementary material has been provided by the authors to give readers additional information about their work.

**eTable. Assessment of Bias Risk of Randomized Clinical Trials**

| Study                     | Sequence generation | Allocation concealment | Blinding of participants and personnel | Blinding of outcome assessment | Incomplete outcome data | Selective outcome data | Other sources of bias |
|---------------------------|---------------------|------------------------|----------------------------------------|--------------------------------|-------------------------|------------------------|-----------------------|
| Brooke 1980               | Low                 | Low                    | Low                                    | Low                            | Low                     | Low                    | Unclear               |
| Chawes 2015               | Low                 | Low                    | Low                                    | Low                            | Low                     | Low                    | Unclear               |
| Cooper 2016               | Low                 | Low                    | Low                                    | Low                            | Low                     | Low                    | Unclear               |
| Dawodu 2013               | Low                 | Low                    | Low                                    | Low                            | Low                     | Low                    | Unclear               |
| Delvin 1986               | Unclear             | Unclear                | High                                   | High                           | High                    | Low                    | Unclear               |
| Goldring 2013 and Yu 2009 | Low                 | Low                    | Low                                    | Low                            | Low                     | Low                    | Unclear               |
| Grant 2014                | Low                 | Low                    | Low                                    | Low                            | Low                     | Low                    | Unclear               |
| Hashemipour 2014          | Low                 | Unclear                | High                                   | Unclear                        | Low                     | Low                    | Unclear               |
| Hollis 2011               | Low                 | Unclear                | Low                                    | Low                            | Low                     | Low                    | Unclear               |
| Hossain 2014              | High                | Unclear                | High                                   | Unclear                        | Low                     | Low                    | Unclear               |
| Kalra 2012                | Low                 | Low                    | Low                                    | Low                            | Low                     | Low                    | Unclear               |
| Karamal 2015              | Low                 | Low                    | Low                                    | Low                            | Low                     | Low                    | Unclear               |
| Litonjua 2016             | Low                 | Low                    | Low                                    | Low                            | Low                     | Low                    | Unclear               |
| Mallet 1986               | Low                 | Low                    | Unclear                                | Unclear                        | Low                     | Low                    | Unclear               |
| March 2015                | Low                 | Low                    | Low                                    | Low                            | High                    | Low                    | Unclear               |
| Marya 1988                | Unclear             | Unclear                | Unclear                                | Unclear                        | Low                     | Low                    | Unclear               |
| Mojibian 2015             | Low                 | Low                    | High                                   | Low                            | Low                     | Low                    | Unclear               |
| Rodda 2015                | High                | Low                    | High                                   | Low                            | High                    | Low                    | Unclear               |

**eTable. Assessment of Bias Risk of Randomized Clinical Trials (continued)**

|                            |         |      |         |         |      |     |         |
|----------------------------|---------|------|---------|---------|------|-----|---------|
| Roth 2013                  | Low     | Low  | Low     | Low     | Low  | Low | Unclear |
| Sablok 2015                | Low     | High | Unclear | Unclear | Low  | Low | Unclear |
| Sahoo 2016                 | Low     | Low  | Low     | Low     | High | Low | Unclear |
| Yap 2014                   | Low     | Low  | Low     | Low     | Low  | Low | Unclear |
| Yesiltepe et Mutlu<br>2014 | Unclear | Low  | High    | High    | High | Low | Unclear |
| Zerofsky 2016              | Low     | Low  | Low     | Low     | Low  | Low | Unclear |

**eFigure 1. Summary Risk Ratio (RR) of the Association Between Vitamin D Supplementation and Small for Gestational Age (SGA) Stratified by Administration Method of Intervention (Regular or Bolus Dose).**

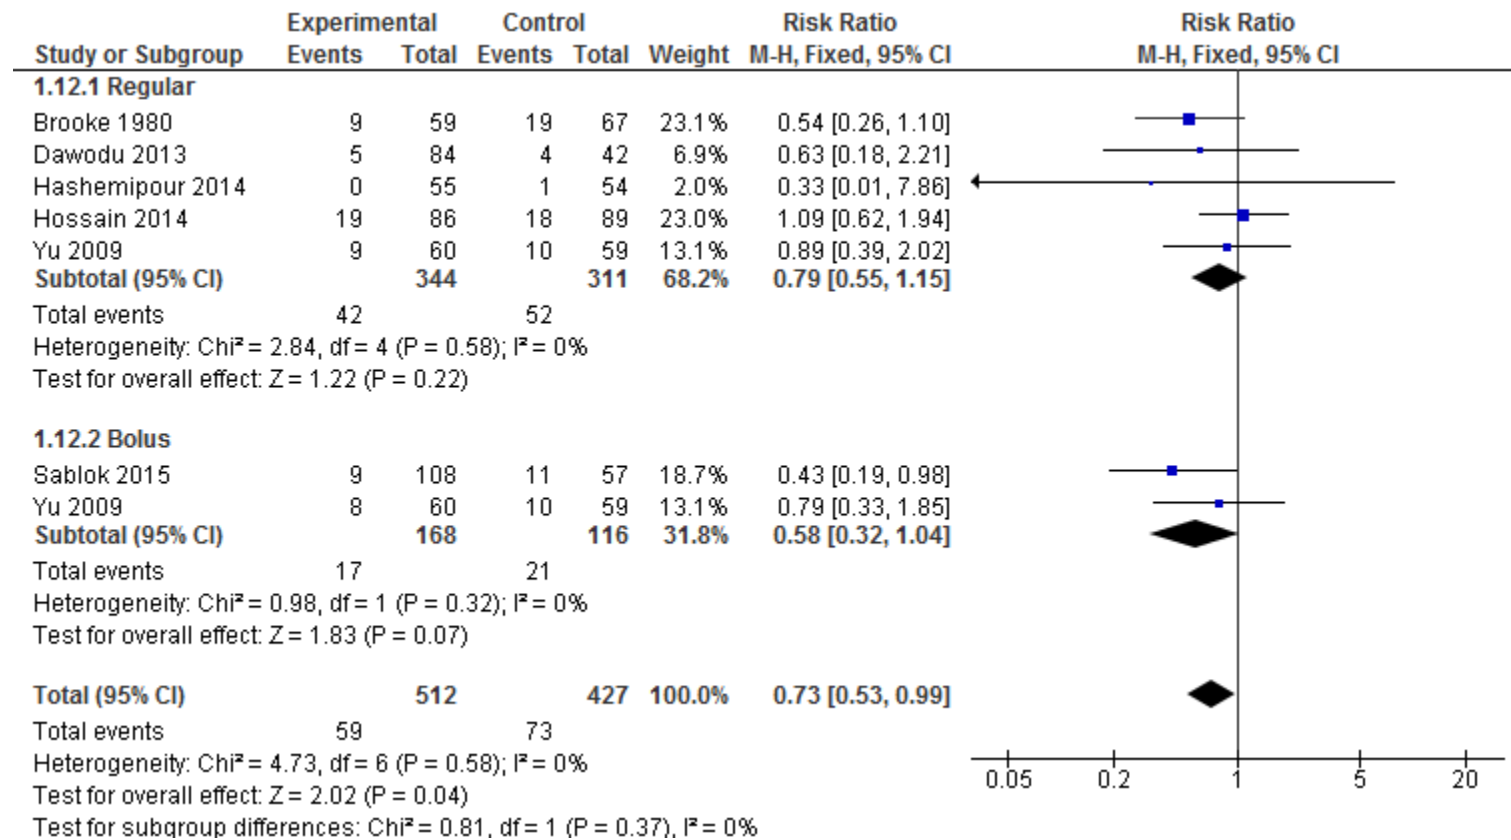

**eFigure 2. Summary Risk Ratio of the Association Between Vitamin D Supplementation and Fetal or Neonatal Mortality Stratified by Administration Method of Intervention (Regular or Bolus Dose).**

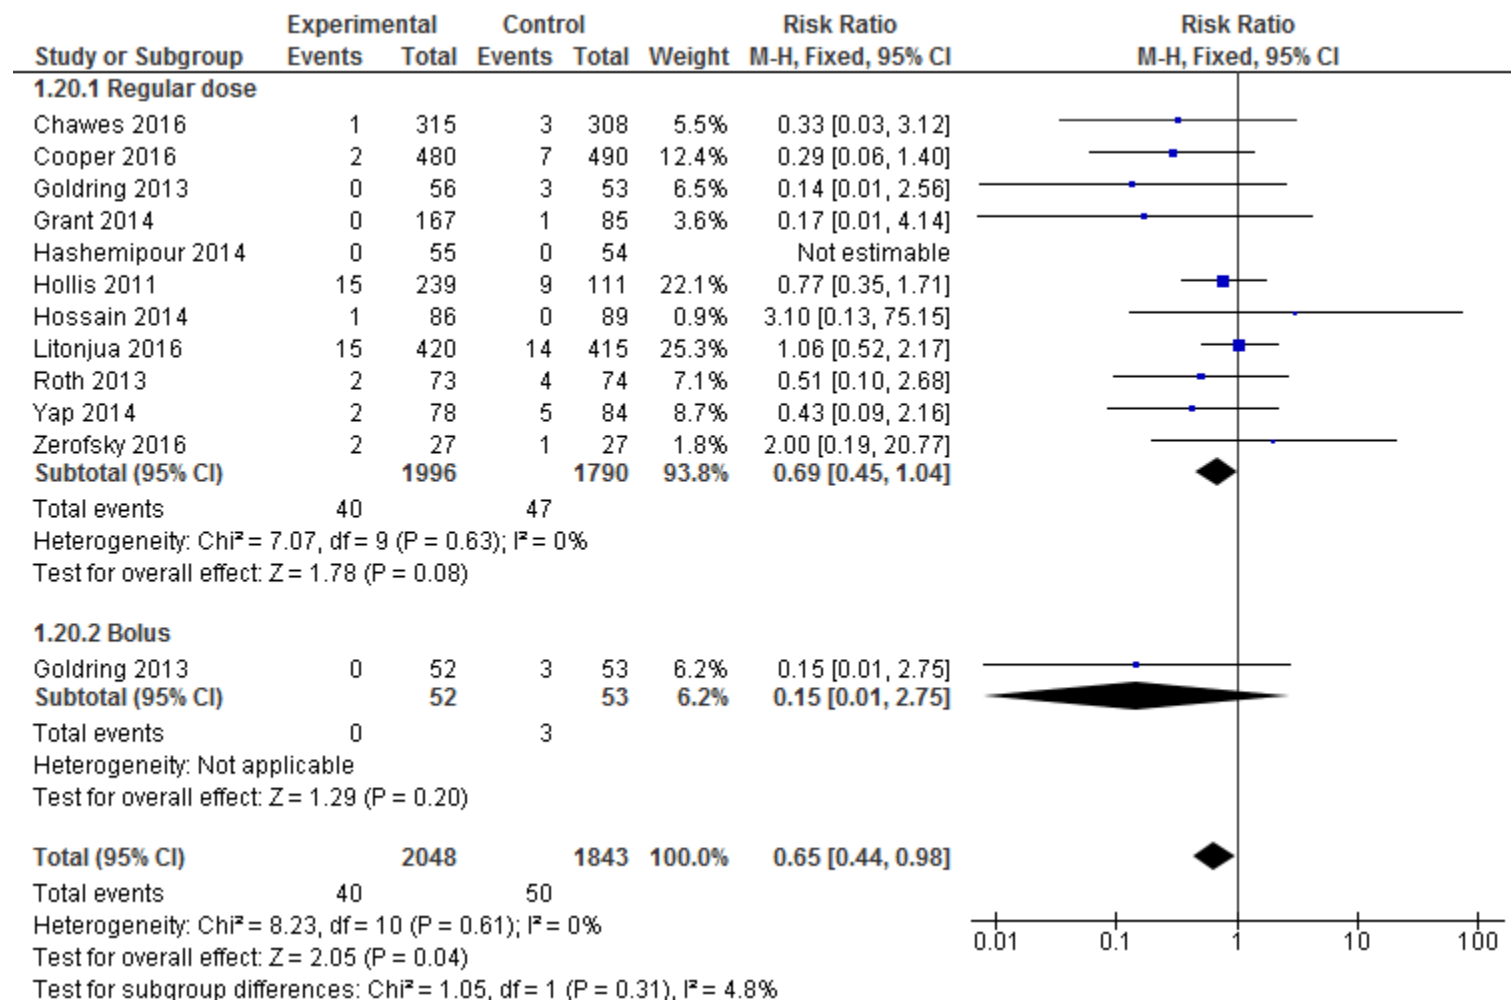

**eFigure 3. Forest Plots of Summary Mean Difference (MD) of Neonatal 25-Hydroxyvitamin D (25[OH]D) (ng/mL) Between Vitamin D Supplementation Group and Control Group. Subgroup analyses by (A) Timing (initiation <20 weeks of gestation or ≥20 weeks of gestation); (B) Dose (>2000IU/day or ≤2000IU/day); and (C) Method (regular doses or bolus) of intervention.**

(A) Timing

| Study or Subgroup                                                                                               | Experimental |       |             | Control |       |             | Weight        | Mean Difference<br>IV, Random, 95% CI |
|-----------------------------------------------------------------------------------------------------------------|--------------|-------|-------------|---------|-------|-------------|---------------|---------------------------------------|
|                                                                                                                 | Mean         | SD    | Total       | Mean    | SD    | Total       |               |                                       |
| <b>1.1.1 Timing of vitamin D supplementation during pregnancy: initiation &lt;20 weeks of gestation</b>         |              |       |             |         |       |             |               |                                       |
| Hollis 2011                                                                                                     | 24.66        | 10.22 | 239         | 18.23   | 10.14 | 111         | 7.6%          | 6.43 [4.14, 8.72]                     |
| Litonjua 2016                                                                                                   | 28           | 12.43 | 303         | 19.2    | 9.99  | 317         | 7.7%          | 8.80 [7.02, 10.58]                    |
| March 2015                                                                                                      | 32.77        | 11.5  | 65          | 30.45   | 10.02 | 40          | 7.0%          | 2.32 [-1.86, 6.50]                    |
| Mojibian 2015                                                                                                   | 37.96        | 18.03 | 186         | 29.75   | 19.03 | 203         | 7.2%          | 8.21 [4.53, 11.89]                    |
| Rodda 2015                                                                                                      | 32.45        | 9.49  | 22          | 16.83   | 7.41  | 23          | 6.7%          | 15.62 [10.63, 20.61]                  |
| Sahoo 2016                                                                                                      | 16.72        | 6.38  | 36          | 7.13    | 5.41  | 16          | 7.3%          | 9.59 [6.22, 12.96]                    |
| Yesiltepe Mutlu 2014                                                                                            | 27.54        | 14.75 | 32          | 7.53    | 3.96  | 19          | 6.5%          | 20.01 [14.80, 25.42]                  |
| <b>Subtotal (95% CI)</b>                                                                                        |              |       | <b>883</b>  |         |       | <b>729</b>  | <b>49.9%</b>  | <b>9.69 [6.64, 12.75]</b>             |
| Heterogeneity: Tau <sup>2</sup> = 13.42; Chi <sup>2</sup> = 37.23, df = 6 (P < 0.00001); I <sup>2</sup> = 84%   |              |       |             |         |       |             |               |                                       |
| Test for overall effect: Z = 6.22 (P < 0.00001)                                                                 |              |       |             |         |       |             |               |                                       |
| <b>1.1.2 Timing of vitamin D supplementation during pregnancy: initiation ≥ 20 weeks of gestation</b>           |              |       |             |         |       |             |               |                                       |
| Brooke 1980                                                                                                     | 55.25        | 33.24 | 59          | 4.09    | 6.56  | 67          | 5.2%          | 51.16 [42.53, 59.79]                  |
| Delvin 1986                                                                                                     | 18.03        | 2     | 14          | 7.01    | 1     | 13          | 7.8%          | 11.02 [9.84, 12.20]                   |
| Goldring 2013                                                                                                   | 12.21        | 5.46  | 68          | 7.53    | 3.77  | 31          | 7.7%          | 4.68 [2.82, 6.54]                     |
| Hashemipour 2014                                                                                                | 27.74        | 5.21  | 55          | 10.92   | 4.41  | 54          | 7.7%          | 16.82 [15.01, 18.63]                  |
| Mallet 1986                                                                                                     | 6.85         | 2.1   | 48          | 2.12    | 1     | 29          | 7.8%          | 4.73 [4.03, 5.43]                     |
| Roth 2013                                                                                                       | 41.19        | 11.46 | 65          | 15.63   | 7.49  | 67          | 7.3%          | 25.56 [22.25, 28.87]                  |
| Yap 2014                                                                                                        | 46.07        | 19.03 | 89          | 29.05   | 12.02 | 90          | 6.8%          | 17.02 [12.35, 21.69]                  |
| <b>Subtotal (95% CI)</b>                                                                                        |              |       | <b>398</b>  |         |       | <b>351</b>  | <b>50.1%</b>  | <b>17.40 [11.85, 22.94]</b>           |
| Heterogeneity: Tau <sup>2</sup> = 52.26; Chi <sup>2</sup> = 431.53, df = 6 (P < 0.00001); I <sup>2</sup> = 99%  |              |       |             |         |       |             |               |                                       |
| Test for overall effect: Z = 6.15 (P < 0.00001)                                                                 |              |       |             |         |       |             |               |                                       |
| <b>Total (95% CI)</b>                                                                                           |              |       | <b>1281</b> |         |       | <b>1080</b> | <b>100.0%</b> | <b>13.50 [10.12, 16.87]</b>           |
| Heterogeneity: Tau <sup>2</sup> = 37.85; Chi <sup>2</sup> = 469.97, df = 13 (P < 0.00001); I <sup>2</sup> = 97% |              |       |             |         |       |             |               |                                       |
| Test for overall effect: Z = 7.84 (P < 0.00001)                                                                 |              |       |             |         |       |             |               |                                       |
| Test for subgroup differences: Chi <sup>2</sup> = 5.69, df = 1 (P = 0.02), I <sup>2</sup> = 82.4%               |              |       |             |         |       |             |               |                                       |

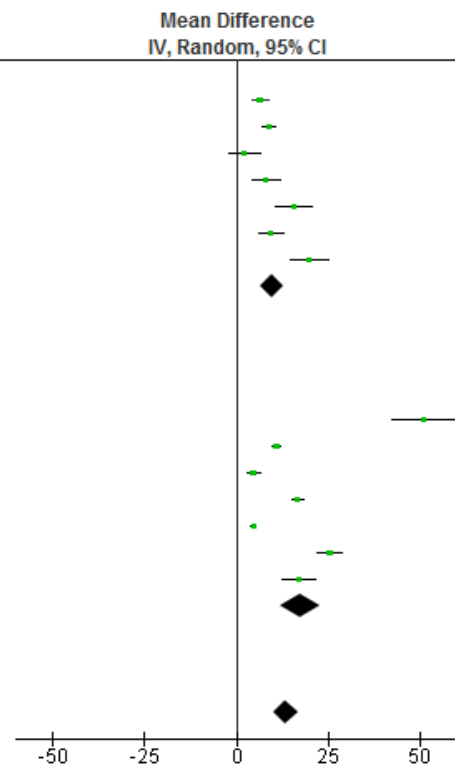

(B) Dose

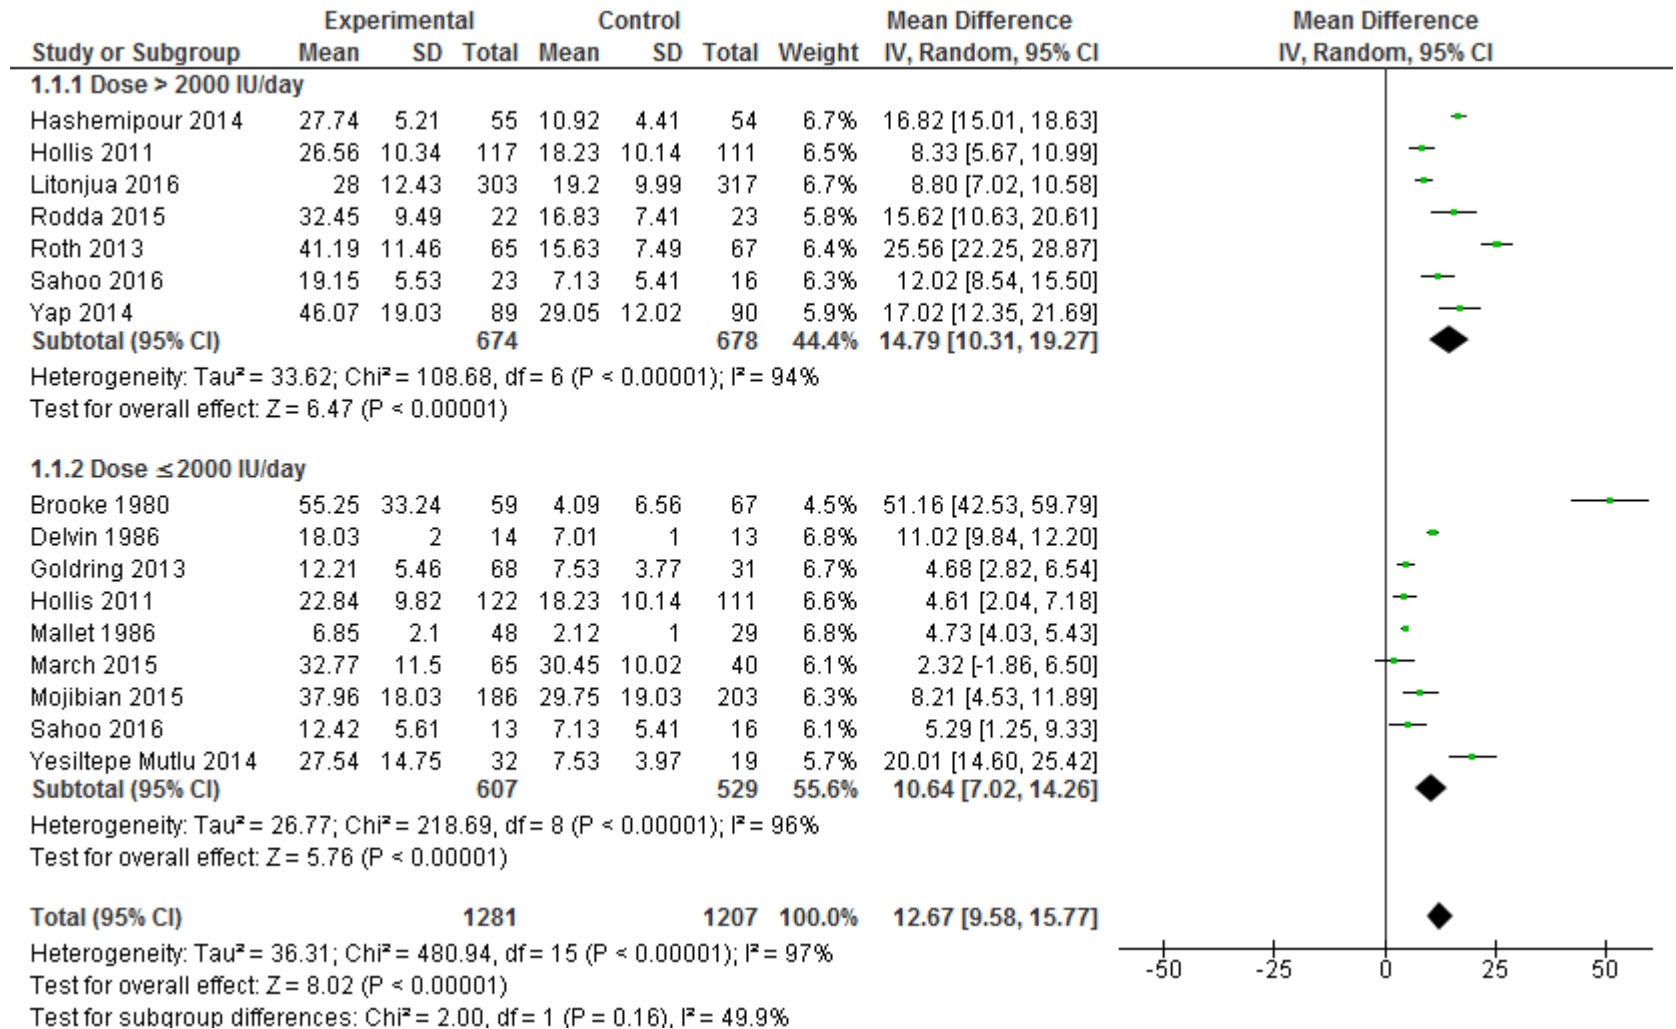

(C) Method (regular doses or bolus)

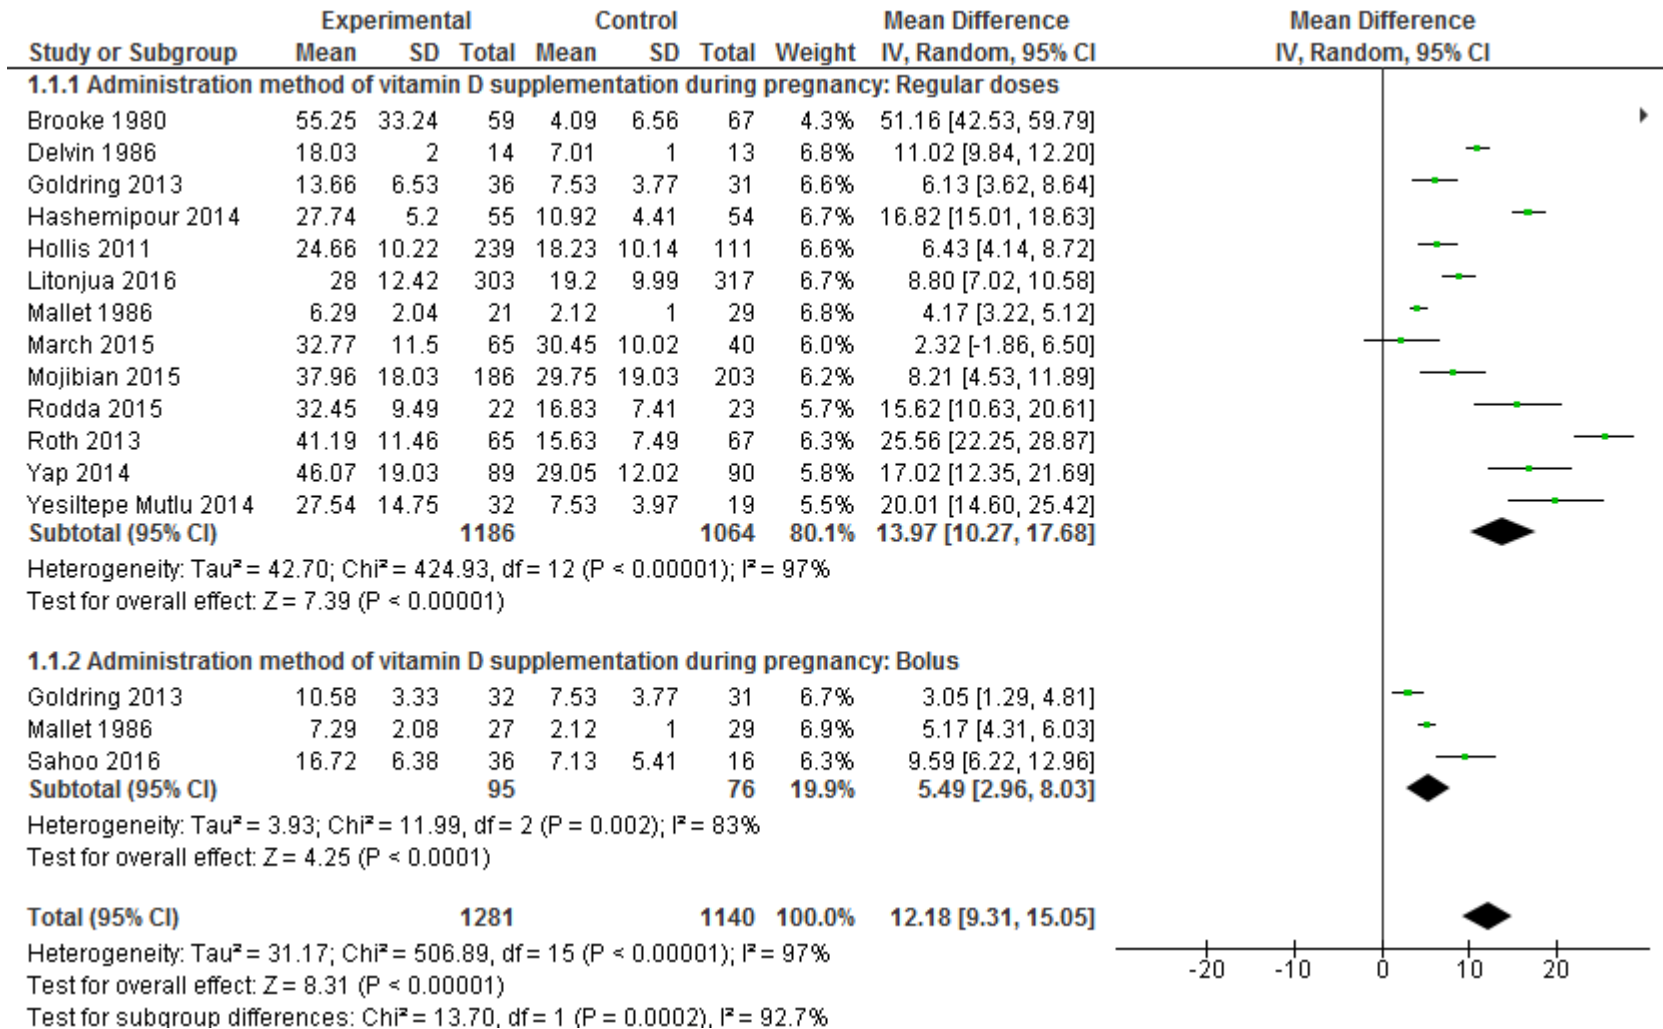



**eFigure 4. Forest Plots of Summary Mean Difference (MD) of Neonatal Calcium (mg/dL) Between Vitamin D Supplementation Group and Control Group.**

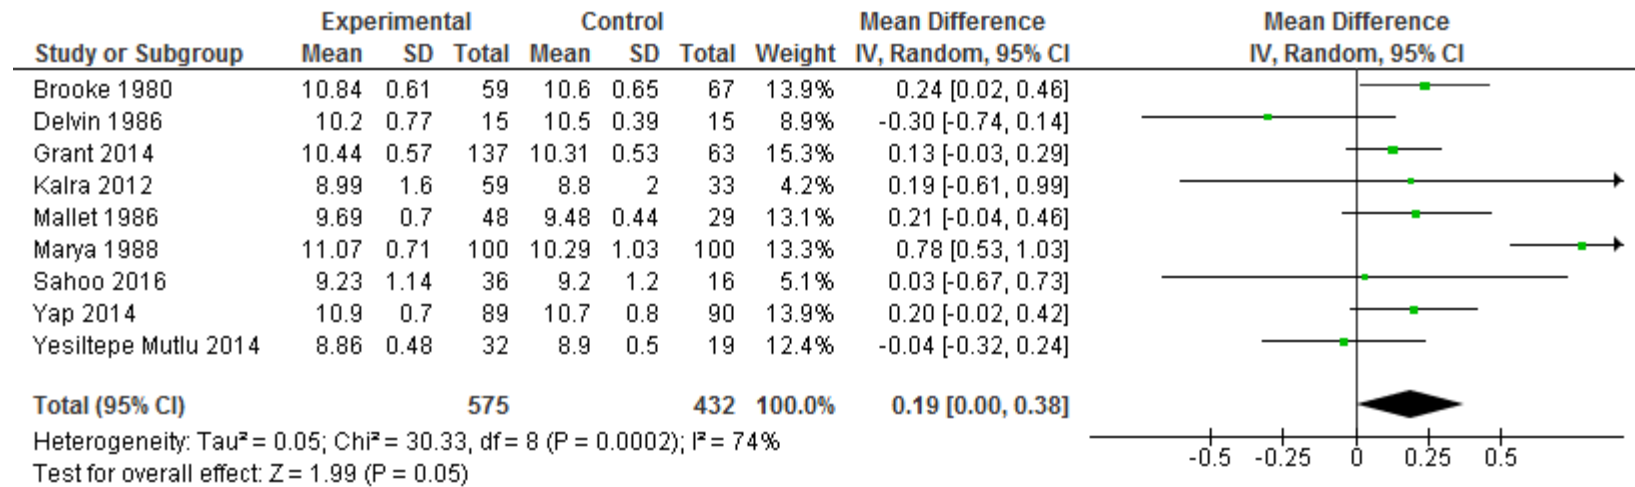

**eFigure 5. Forest Plots of Summary Mean Difference (MD) of Birth Weight (g) Between Vitamin D Supplementation Group and Control Group. Subgroup analyses by (A) Timing (initiation <20 weeks of gestation or ≥20 weeks of gestation); (B) Dose (>2000IU/day or ≤2000IU/day); and (C) Method (regular doses or bolus) of intervention.**

(A) Timing

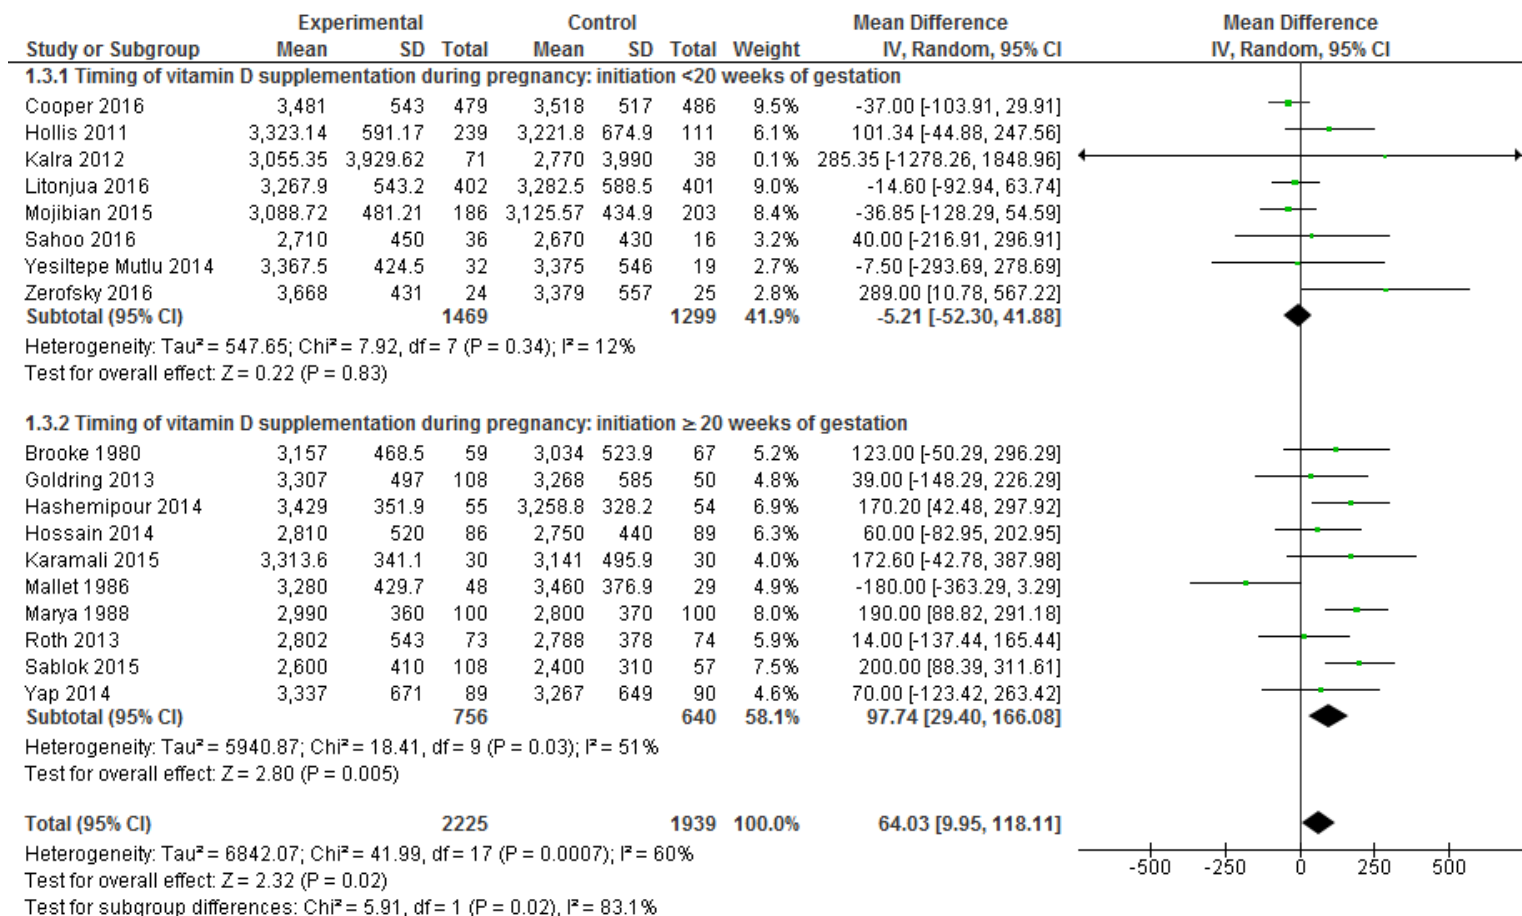

(B) Dose

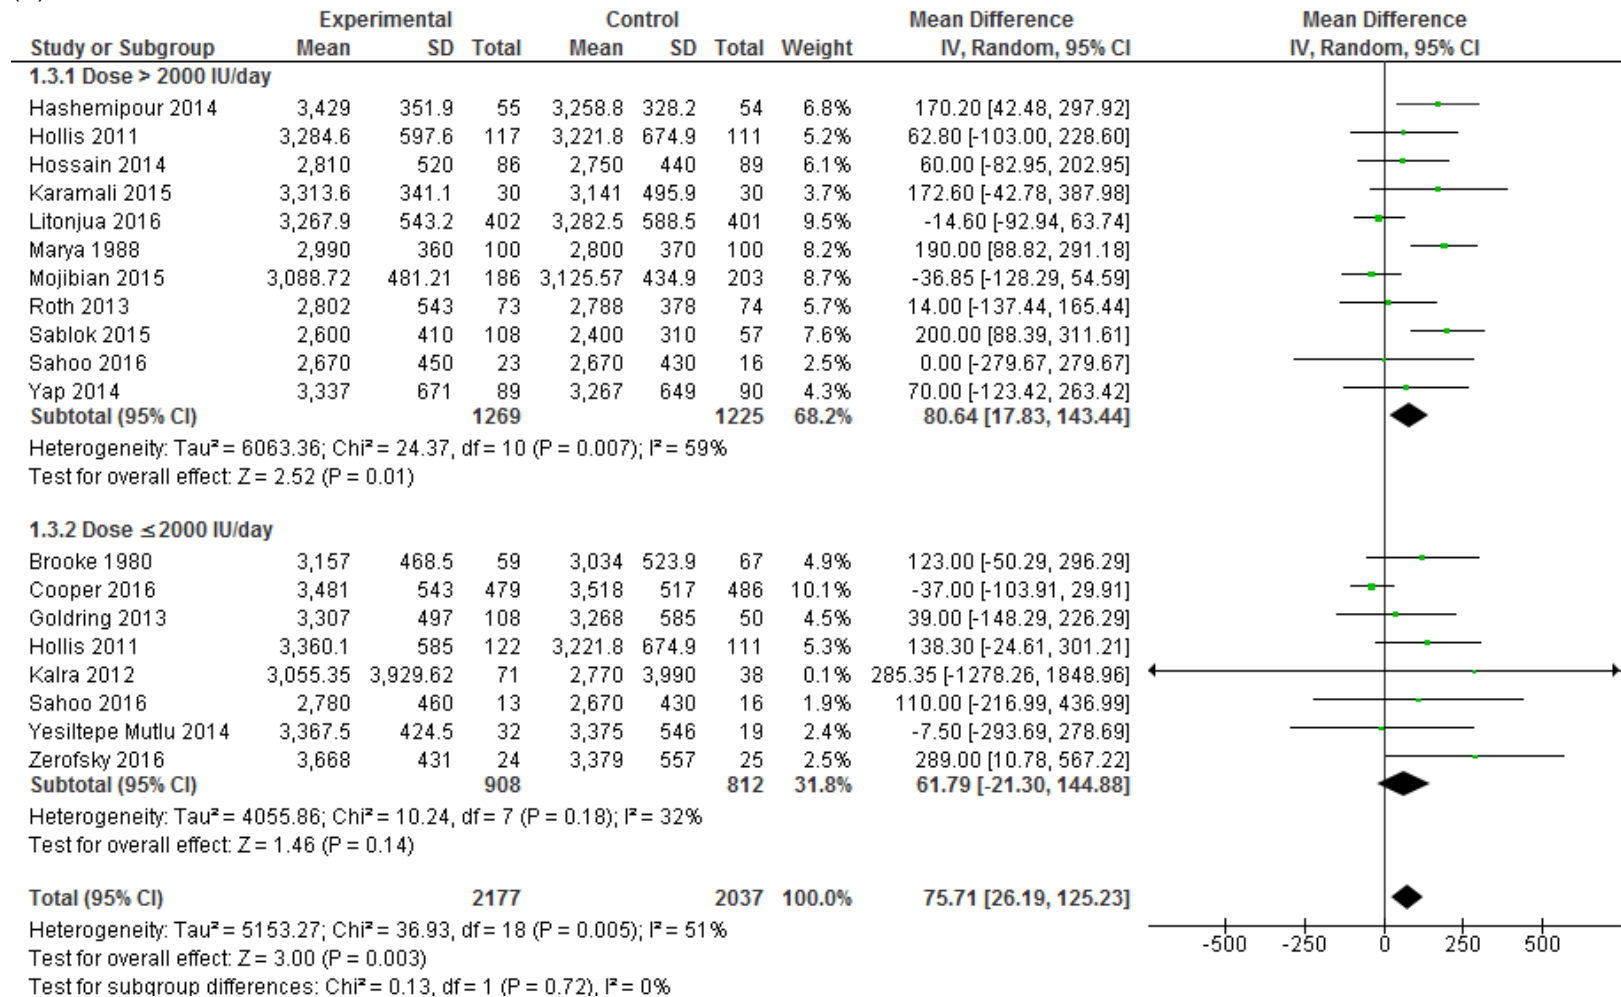

(C) Method (regular doses or bolus)

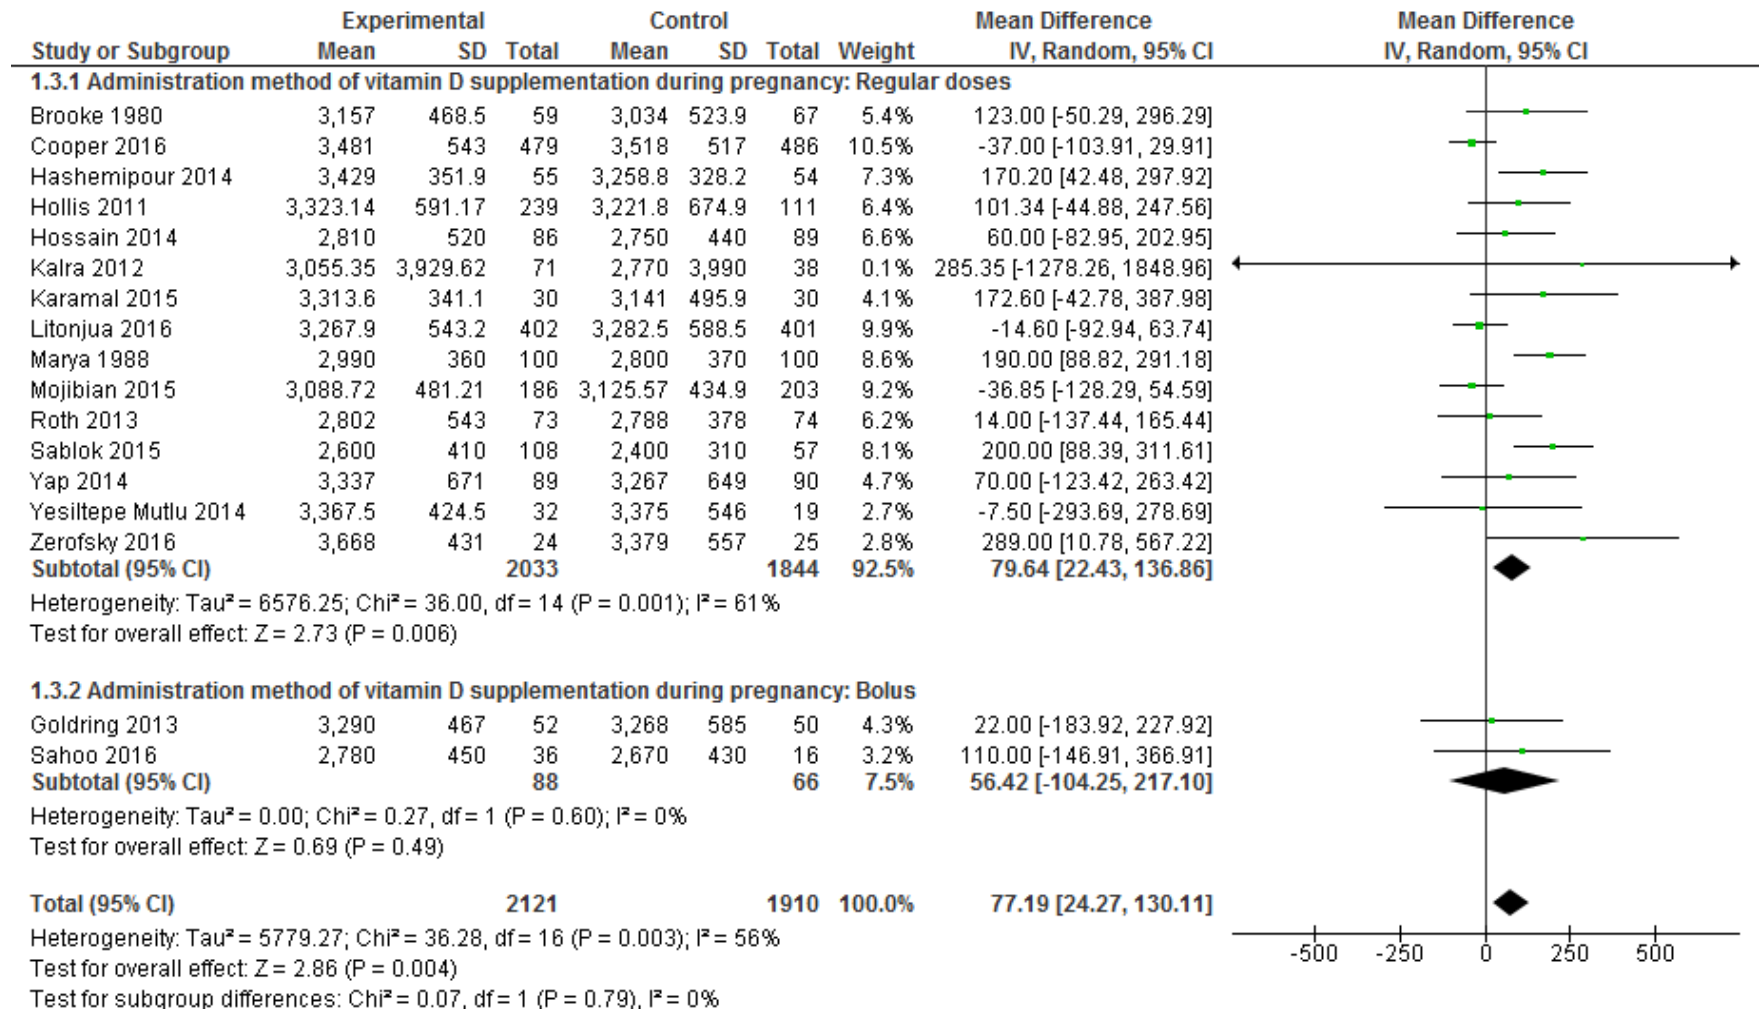

**eFigure 6. Forest Plots of Summary Mean Difference (MD) of Postnatal Weight (kg) Between Vitamin D Supplementation Group and Control Group in Infants at Age (A) 3 Months; (B) 6 Months; (C) 9 Months; and (D) 12 Months.**

(A)

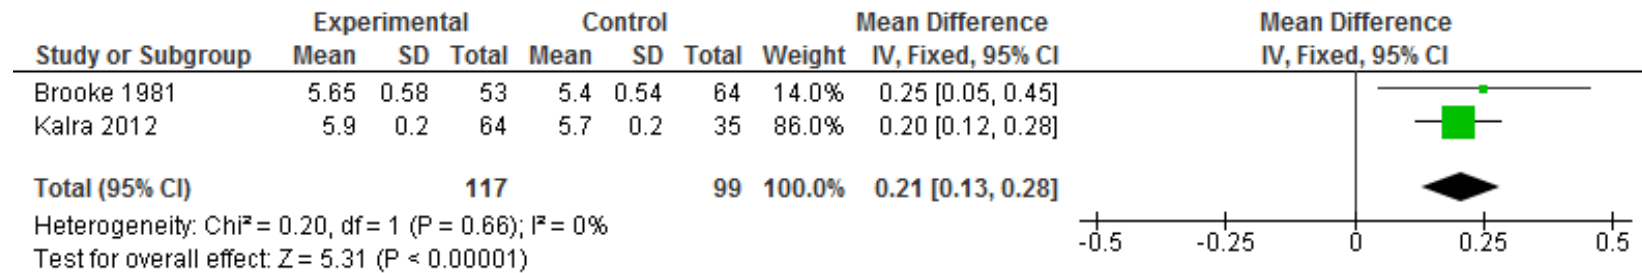

(B)

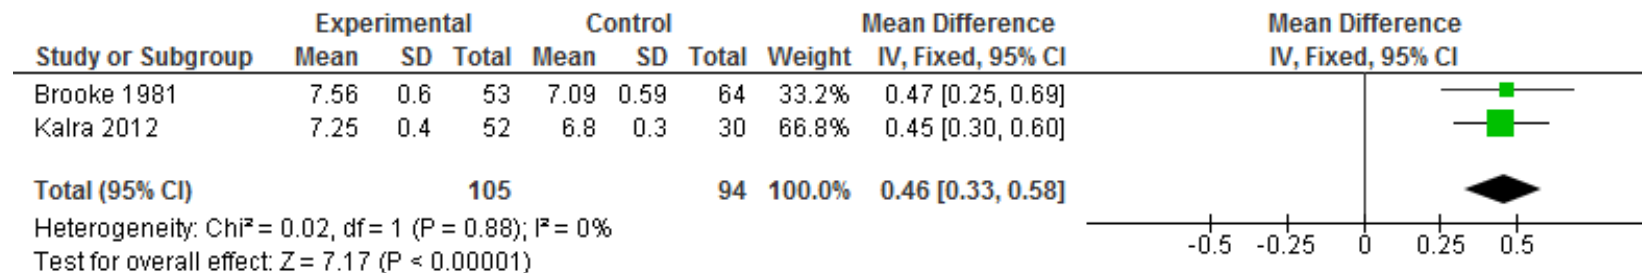

(C)

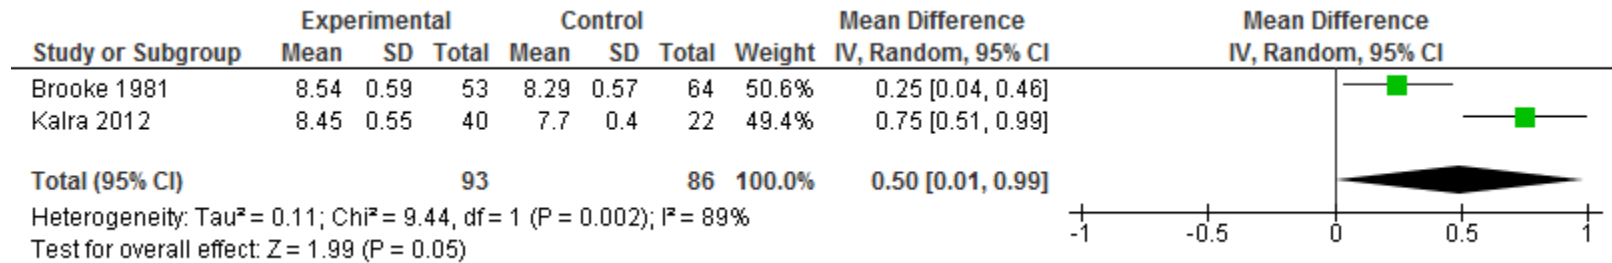

(D)

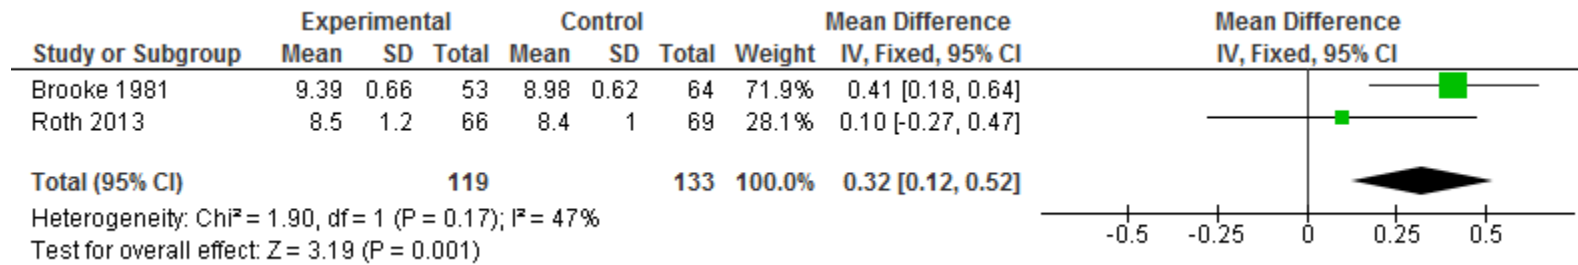

**eFigure 7. The Funnel Plots of the Primary Outcomes. (A) Funnel plots for SGA; (B) Funnel plots for fetal or neonatal mortality.**

(A) Funnel plots for SGA

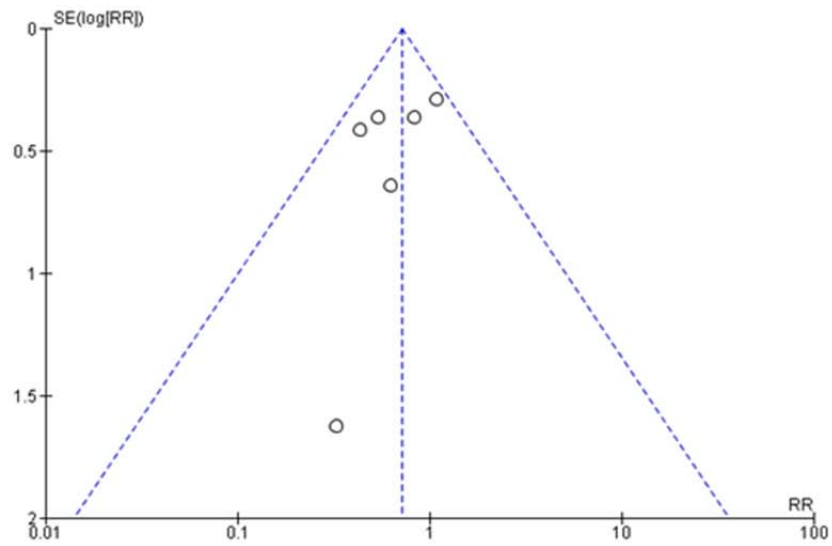

(B) Funnel plots for fetal or neonatal mortality

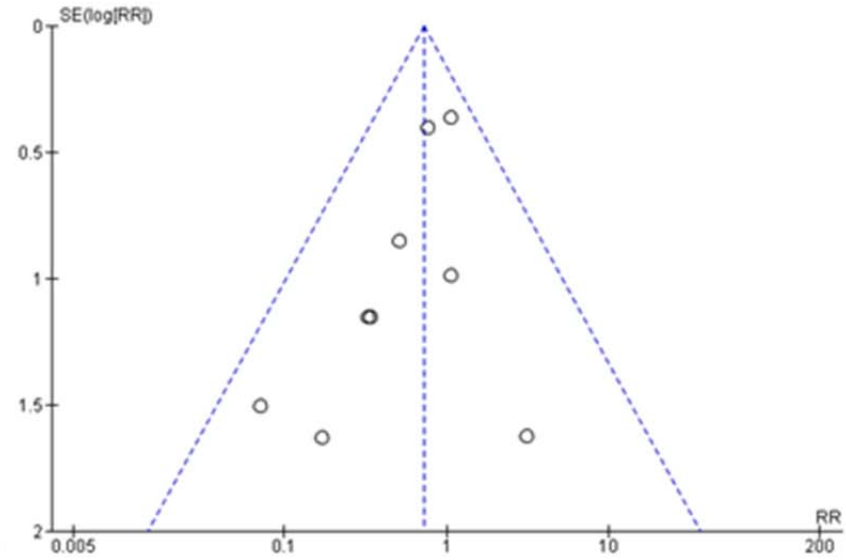

Supplement: jamapediatr-172-635-s001.pdf [file jamapediatr-172-635-s001.pdf]
